# Supplementary material for: An effective surface modification strategy with high reproducibility for simultaneously improving efficiency and stability of inverted MA-free perovskite solar cells
Source: Royal Society of Chemistry journal article supplement (doi:10.1039/c9ta07238a), 2019-01-01
Supplement: c9ta07238a1.pdf [file c9ta07238a1.pdf]

## Supporting Information

### An effective surface modification strategy with high reproducibility for simultaneously improving efficiency and stability of inverted MA- free perovskite solar cells

Hongmei Zhu,<sup>+</sup> Shaohang Wu,<sup>+</sup> Jiayu Yao, Rui Chen, Ming Pan, Weitao Chen, Jing Zhou, Wenjun Zhang, Tao Wang, and Wei Chen\*

Mr. J. Yao, Prof. T. Wang

State Key Laboratory of Silicate Materials for Architectures, Wuhan University of Technology, Wuhan 430070, China

Ms. H. Zhu, Dr. S. Wu, Mr. R. Chen, Mr. M Pan, Mr. W. Chen, Mr. W. Chen, Ms. J. Zhou, Dr. W. Zhang, Prof. W. Chen

Wuhan National Laboratory for Optoelectronics, Huazhong University of Science and Technology, Luoyu Road 1037, Wuhan 430074, China

<sup>+</sup>These two authors contributed equally to this work

Corresponding Authors, E-mail: [wnlochenwei@mail.hust.edu.cn](mailto:wnlochenwei@mail.hust.edu.cn) (W. Chen)

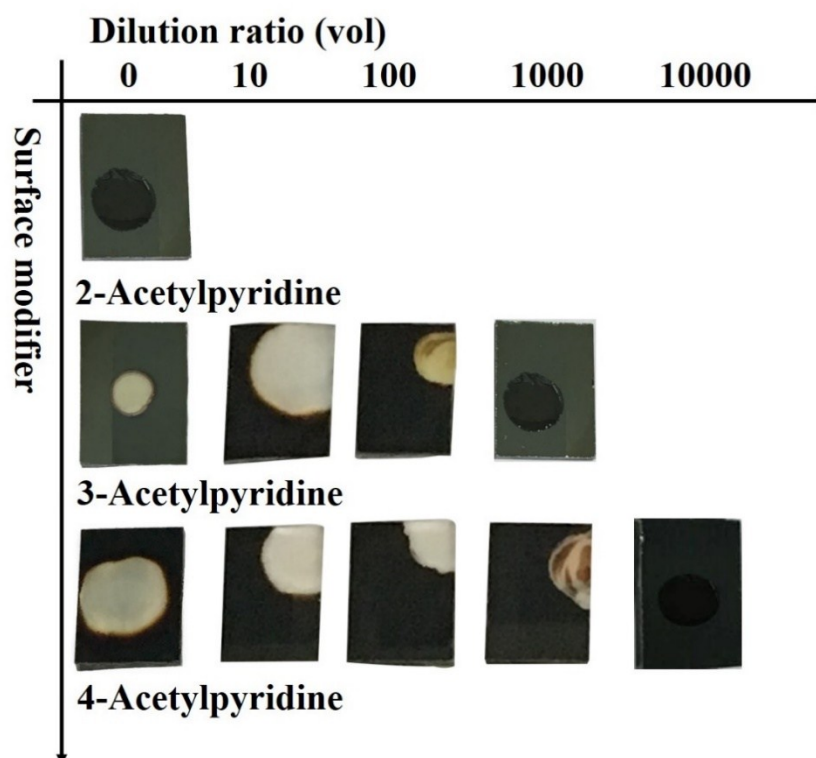

**Figure S1.** Optical photographs of the corresponding states when one drop of surface modification solution (diluted in diethyl ether with different dilution ratios) was dropped on the surface of perovskite films.

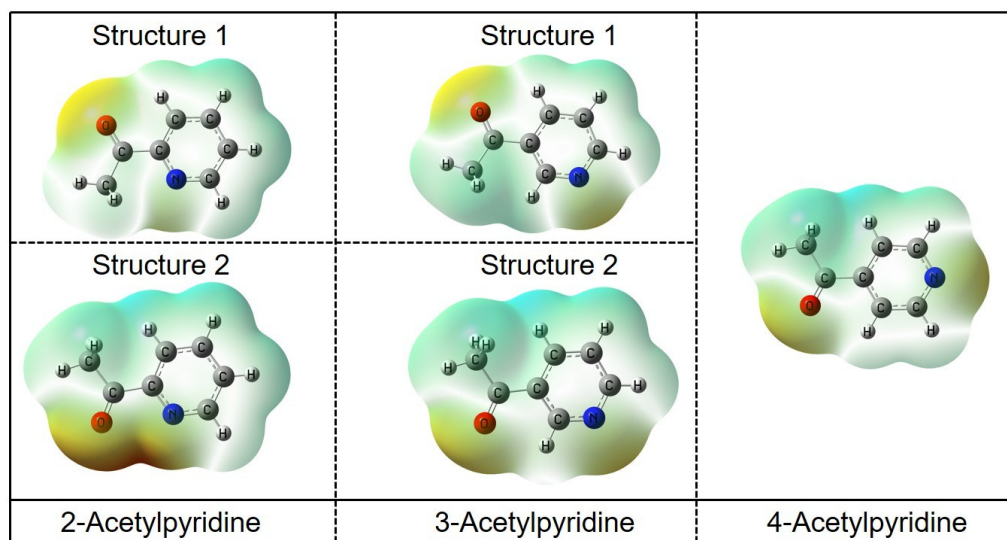

**Figure S2.** Calculated dipole moments of the surface modifiers used in this work.

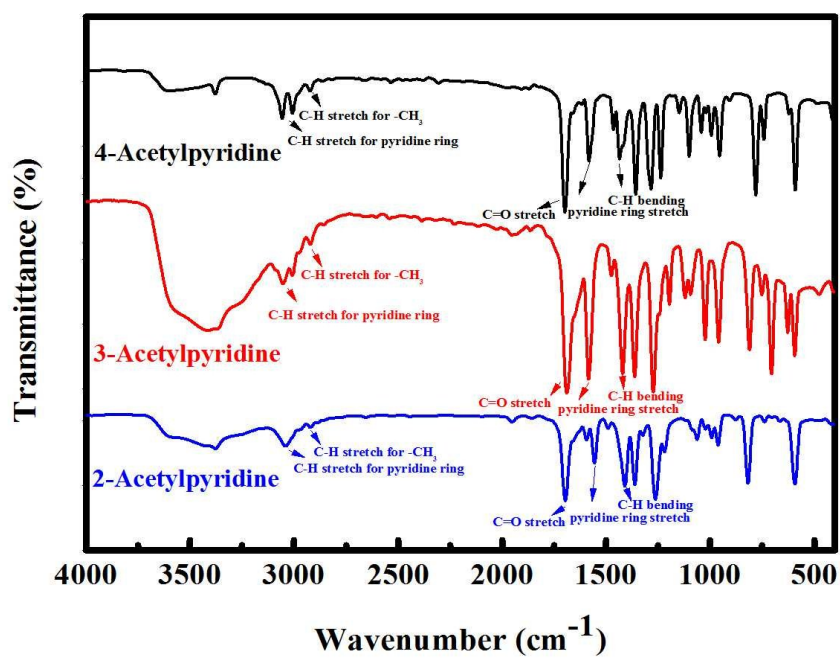

**Figure S3.** FT-IR spectroscopy of the surface modifiers used in this work (2-Acetylpyridine, 3-Acetylpyridine, and 4-Acetylpyridine).

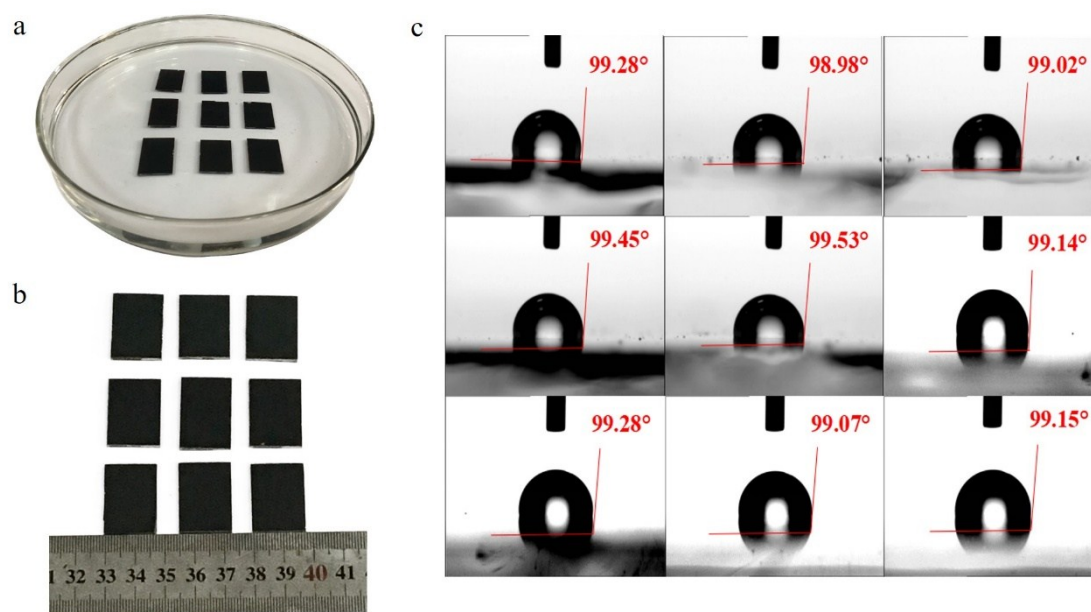

**Figure S4.** (a) Optical photographs of the process of surface modification. (b) Optical photographs of the perovskite films after surface modification treatment. (c) The corresponding contact angle test results of the modified perovskite films shown in (b).

### Supplementary Table S1.

Performance parameters of the PSCs based on the perovskite films treated with different surface modifiers.

| Condition        | $J_{sc}$<br>(mA•cm <sup>-2</sup> ) | $V_{oc}$<br>(V) | FF<br>(%)  | PCE<br>(%)  | Series<br>resistances<br>( $\Omega$ •cm <sup>2</sup> ) | Shunt<br>resistances<br>( $\Omega$ •cm <sup>2</sup> ) |
|------------------|------------------------------------|-----------------|------------|-------------|--------------------------------------------------------|-------------------------------------------------------|
| Pristine         | 20.73±1.37                         | 0.96±0.07       | 70.46±3.12 | 15.68±1.07  | 5.52±0.31                                              | 652.38±326.71                                         |
| 2-Acetylpyridine | 22.58±0.65                         | 1.06±0.02       | 78.51±1.41 | 19.07±0.98  | 4.21±0.08                                              | 2779.29±153.26                                        |
| 3-Acetylpyridine | 21.88±0.92                         | 1.02±0.04       | 75.19±2.02 | 17.65 ±1.01 | 4.73±0.15                                              | 2128.85±239.81                                        |
| 4-Acetylpyridine | 21.66±0.96                         | 1.00±0.05       | 74.1±2.39  | 17.12±1.03  | 4.86±0.17                                              | 1284.3±262.73                                         |

**Supplementary Table S2.** Summary of the photovoltaic parameters for the PSCs with and without surface modification before and after aging (maintained in ambient at room temperature), scanning mode: forward scan (from -0.2 V to 1.2 V).

| <b>Devices</b>          | <b>Condition<br/>@Stored in<br/>ambient air</b> | <b><i>J</i><sub>sc</sub><br/>(mA•cm<sup>-2</sup>)</b> | <b><i>V</i><sub>oc</sub><br/>(V)</b> | <b>FF<br/>(%)</b> | <b>PCE<br/>(%)</b> | <b>PCE<br/>/PCE<sub>initial</sub></b> |
|-------------------------|-------------------------------------------------|-------------------------------------------------------|--------------------------------------|-------------------|--------------------|---------------------------------------|
| <b>Pristine</b>         | <b>Fresh</b>                                    | <b>21.98</b>                                          | <b>1.03</b>                          | <b>73.41</b>      | <b>16.62</b>       | <b>100%</b>                           |
|                         | <b>Aged,<br/>2000h</b>                          | <b>11.07</b>                                          | <b>0.85</b>                          | <b>54.71</b>      | <b>5.15</b>        | <b>31%</b>                            |
| <b>2-Acetylpyridine</b> | <b>Fresh</b>                                    | <b>23.07</b>                                          | <b>1.08</b>                          | <b>79.44</b>      | <b>19.79</b>       | <b>100%</b>                           |
|                         | <b>Aged,<br/>2000h</b>                          | <b>22.31</b>                                          | <b>1.07</b>                          | <b>78.75</b>      | <b>18.8</b>        | <b>95%</b>                            |
| <b>3-Acetylpyridine</b> | <b>Fresh</b>                                    | <b>22.74</b>                                          | <b>1.06</b>                          | <b>77.01</b>      | <b>18.56</b>       | <b>100%</b>                           |
|                         | <b>Aged,<br/>2000h</b>                          | <b>21.51</b>                                          | <b>1.04</b>                          | <b>68.04</b>      | <b>15.22</b>       | <b>82%</b>                            |
| <b>4-Acetylpyridine</b> | <b>Fresh</b>                                    | <b>22.57</b>                                          | <b>1.05</b>                          | <b>76.46</b>      | <b>18.12</b>       | <b>100%</b>                           |
|                         | <b>Aged,<br/>2000h</b>                          | <b>20.86</b>                                          | <b>1.01</b>                          | <b>64.5</b>       | <b>13.59</b>       | <b>75%</b>                            |

**Supplementary Table S3.** Summary of the photovoltaic parameters for the PSCs with and without surface modification before and after aging (thermal aging @ 85°C in the dark in an N<sub>2</sub> atmosphere), scanning mode: forward scan (from -0.2 V to 1.2 V)

| <b>Devices</b>          | <b>Condition @ thermal aging at 85°C</b> | <b><i>J</i><sub>sc</sub> (mA•cm<sup>-2</sup>)</b> | <b><i>V</i><sub>oc</sub> (V)</b> | <b>FF (%)</b> | <b>PCE (%)</b> | <b>PCE /PCE<sub>initial</sub></b> |
|-------------------------|------------------------------------------|---------------------------------------------------|----------------------------------|---------------|----------------|-----------------------------------|
| <b>Pristine</b>         | <b>Fresh</b>                             | <b>21.99</b>                                      | <b>1.03</b>                      | <b>73.47</b>  | <b>16.64</b>   | <b>100%</b>                       |
|                         | <b>Aged, 500h</b>                        | <b>14.67</b>                                      | <b>0.95</b>                      | <b>65.65</b>  | <b>9.15</b>    | <b>55%</b>                        |
| <b>2-Acetylpyridine</b> | <b>Fresh</b>                             | <b>23.05</b>                                      | <b>1.08</b>                      | <b>79.71</b>  | <b>19.84</b>   | <b>100%</b>                       |
|                         | <b>Aged, 500h</b>                        | <b>21.73</b>                                      | <b>1.07</b>                      | <b>77.16</b>  | <b>17.94</b>   | <b>90.4%</b>                      |
| <b>3-Acetylpyridine</b> | <b>Fresh</b>                             | <b>22.76</b>                                      | <b>1.06</b>                      | <b>77.01</b>  | <b>18.58</b>   | <b>100%</b>                       |
|                         | <b>Aged, 500h</b>                        | <b>20.91</b>                                      | <b>1.03</b>                      | <b>64.72</b>  | <b>13.94</b>   | <b>75%</b>                        |
| <b>4-Acetylpyridine</b> | <b>Fresh</b>                             | <b>22.57</b>                                      | <b>1.05</b>                      | <b>76.33</b>  | <b>18.09</b>   | <b>100%</b>                       |
|                         | <b>Aged, 500h</b>                        | <b>20.38</b>                                      | <b>1.01</b>                      | <b>60.63</b>  | <b>12.48</b>   | <b>69%</b>                        |

**Supplementary Table S4.** Summary of the photovoltaic parameters for the PSCs with and without surface modification before and after aging (light soaking @ N<sub>2</sub>, near MPP, at 45 °C), scanning mode: forward scan (from -0.2 V to 1.2 V).

| <b>Devices</b>          | <b>Condition<br/>@ light soaking,<br/>MPP, 45 °C</b> | <b><i>J</i><sub>sc</sub><br/>(mA•cm<sup>-2</sup>)</b> | <b><i>V</i><sub>oc</sub><br/>(V)</b> | <b>FF<br/>(%)</b> | <b>PCE<br/>(%)</b> | <b>PCE<br/>/PCE<sub>initial</sub></b> |
|-------------------------|------------------------------------------------------|-------------------------------------------------------|--------------------------------------|-------------------|--------------------|---------------------------------------|
| <b>Pristine</b>         | <b>Fresh</b>                                         | <b>22.03</b>                                          | <b>1.03</b>                          | <b>73.64</b>      | <b>16.71</b>       | <b>100%</b>                           |
|                         | <b>Aged,<br/>500h</b>                                | <b>14.19</b>                                          | <b>0.94</b>                          | <b>63.05</b>      | <b>8.41</b>        | <b>50.3%</b>                          |
| <b>2-Acetylpyridine</b> | <b>Fresh</b>                                         | <b>23.03</b>                                          | <b>1.08</b>                          | <b>79.65</b>      | <b>19.81</b>       | <b>100%</b>                           |
|                         | <b>Aged,<br/>500h</b>                                | <b>22.17</b>                                          | <b>1.07</b>                          | <b>76.51</b>      | <b>18.15</b>       | <b>91.6%</b>                          |
| <b>3-Acetylpyridine</b> | <b>Fresh</b>                                         | <b>22.76</b>                                          | <b>1.06</b>                          | <b>76.89</b>      | <b>18.55</b>       | <b>100%</b>                           |
|                         | <b>Aged,<br/>500h</b>                                | <b>20.56</b>                                          | <b>1.04</b>                          | <b>69.73</b>      | <b>14.91</b>       | <b>80.4%</b>                          |
| <b>4-Acetylpyridine</b> | <b>Fresh</b>                                         | <b>22.57</b>                                          | <b>1.05</b>                          | <b>76.33</b>      | <b>18.09</b>       | <b>100%</b>                           |
|                         | <b>Aged,<br/>500h</b>                                | <b>20.64</b>                                          | <b>1.01</b>                          | <b>62.03</b>      | <b>12.93</b>       | <b>71.5%</b>                          |
